# Supplementary material
Source: Research Square preprint supplement (doi:10.21203/rs.3.rs-8823009/v1)
Supplement: Supplementary file 1 [file ebff1249424fe2f05dde7c68.docx]

**Supplementary** **table** **1** Demographic characteristics between the depression and control groups

|  | **HC** **(n=40)** | **MDD(n=75)** | **U/χ2** | **P** **value** | **FDR** |
| --- | --- | --- | --- | --- | --- |
| Age, [M (Q1, Q3)] | 31.00 (25.75, 36.00) | 34.00 (25.00, 50.00) | 1383.00 | 0.493 | 0.976 |
| BMI, [M (Q1, Q3)] | 22.55 (20.41, 24.79) | 21.51 (19.65, 24.80) | 1674.00 | 0.308 | 0.771 |
| Gender |  |  | 1.24 | 0.266 | 0.771 |
| Female,n(%) | 20 (50.0%) | 47 (62.7%) |  |  |  |
| Male, n(%) | 20 (50.0%) | 28 (37.3%) |  |  |  |
| Personality |  |  | 5.84 | 0.054 | 0.395 |
| Introvert,n(%) | 10 (25.0%) | 36 (48.0%) |  |  |  |
| Extrovert,n(%) | 9 (22.5%) | 13 (17.3%) |  |  |  |
| Ambivert,n(%) | 21 (52.5%) | 26 (34.7%) |  |  |  |
| Educational |  |  | 0.27 | 0.604 | 0.976 |
| <=12years,n(%) | 22 (55.0%) | 36 (48.0%) |  |  |  |
| > 12years,n(%) | 18 (45.0%) | 39 (52.0%) |  |  |  |
| Occupation,n(%) |  |  | 3.09 | 0.079 | 0.395 |
| Unemployment,n(%) | 0 (0.0%) | 8 (10.7%) |  |  |  |
| Employment | 40 (100.0%) | 67 (89.3%) |  |  |  |
| Only Child |  |  | 0.17 | 0.683 | 0.976 |
| Yes,n(%) | 7 (17.5%) | 17 (22.7%) |  |  |  |
| No,n(%) | 33 (82.5%) | 58 (77.3%) |  |  |  |
| Marital Status |  |  | 0.00 | 1.000 | 1.000 |
| Unmarried,n(%) | 19 (47.5%) | 37 (49.3%) |  |  |  |
| Married,n(%) | 21 (52.5%) | 38 (50.7%) |  |  |  |
| Household Type |  |  | 0.49 | 0.784 | 0.980 |
| Nuclear,n(%) | 28 (70.0%) | 57 (76.0%) |  |  |  |
| Extended,n(%) | 6 (15.0%) | 9 (12.0%) |  |  |  |
| Middle,n(%) | 6 (15.0%) | 9 (12.0%) |  |  |  |
| Income |  |  | 0.09 | 0.956 | 1.000 |

| <=3000yuan,n(%) | 9 (22.5%) | 17 (22.7%) |
| --- | --- | --- |
| 3000-5000yuan,n(%) | 16 (40.0%) | 28 (37.3%) |
| >=5000yuan,n(%) | 15 (37.5%) | 30 (40.0%) |

Note: HC:healthy control, MDD: major depression disorder, FDR: false discovery rate
